# Supplementary material for: Ultrasound Assisted Extraction of Polyphenols from Ripe Carob Pods (Ceratonia siliqua L.): Combined Designs for Screening and Optimizing the Processing Parameters
Source: MDPI journal article supplement (doi:10.3390/foods11030284), 2022-01-21
Supplement: s1 [file s1]

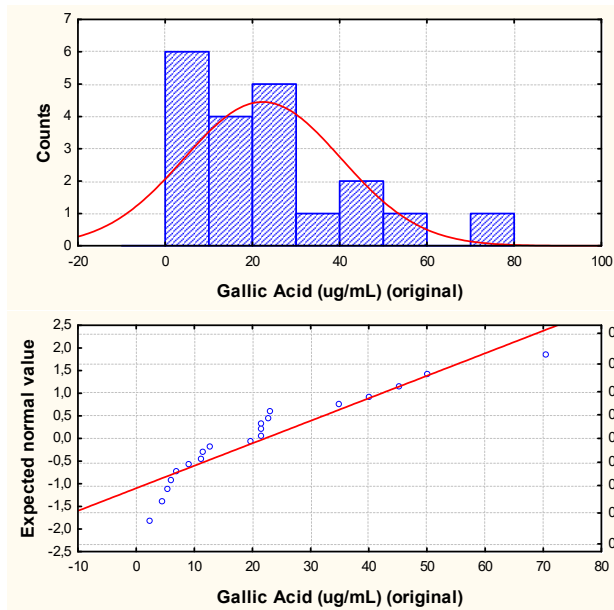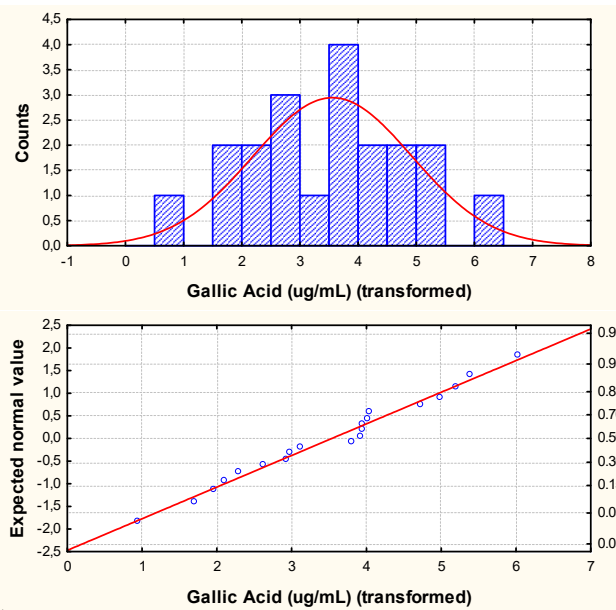

a)

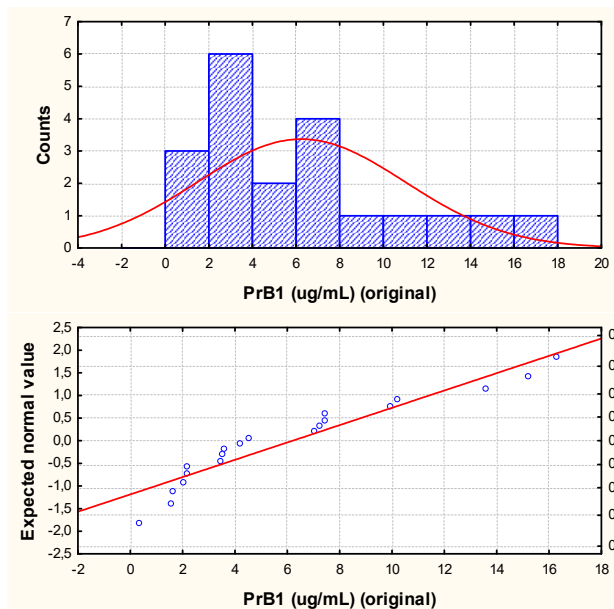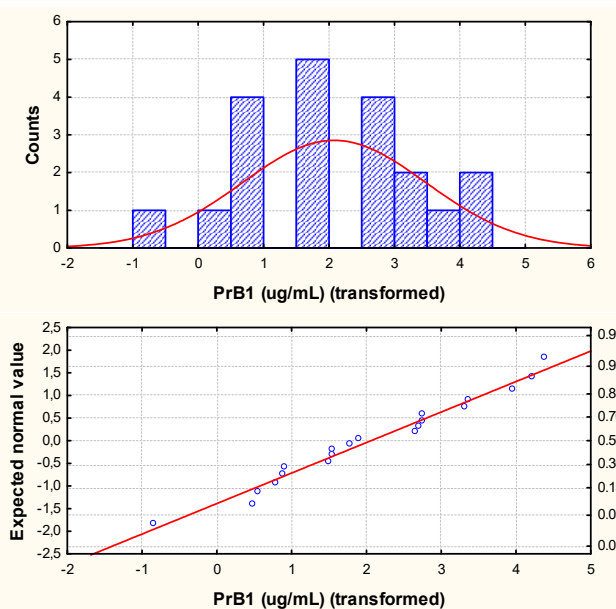

b)

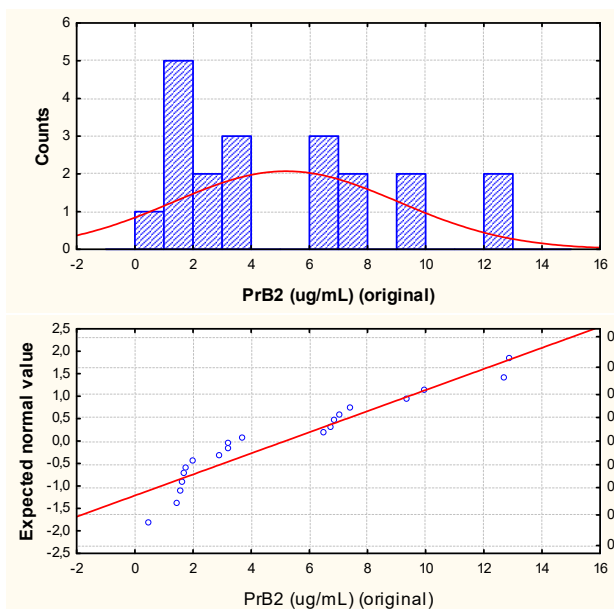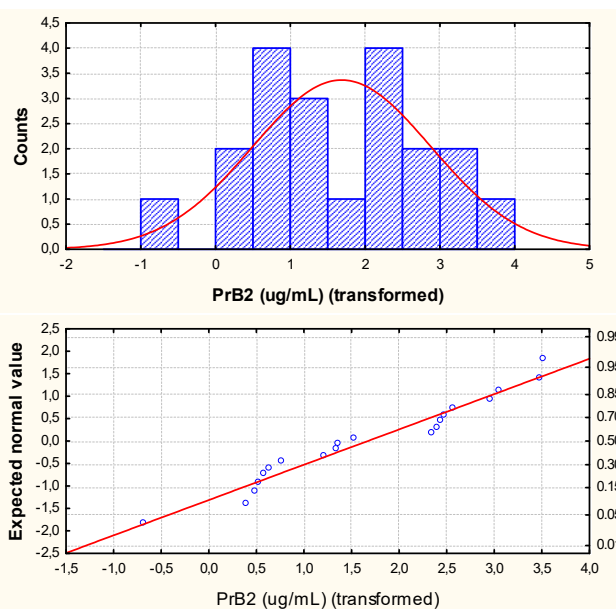

c)

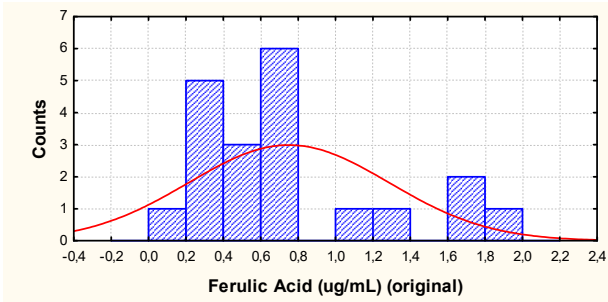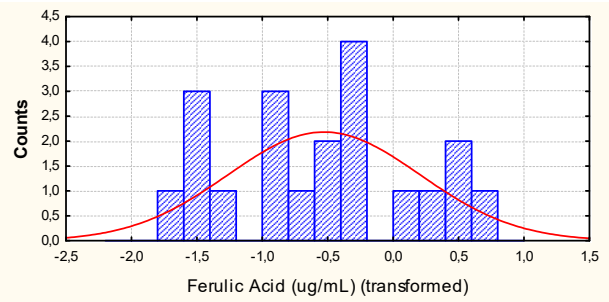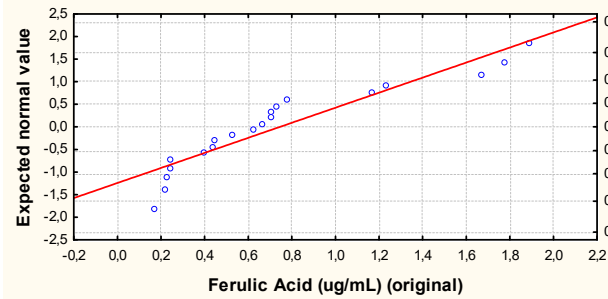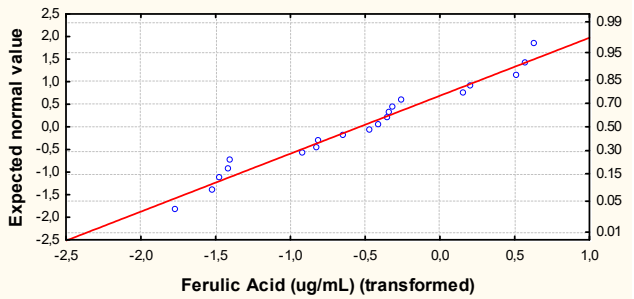

d)

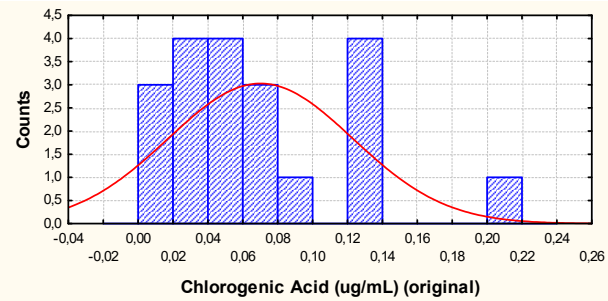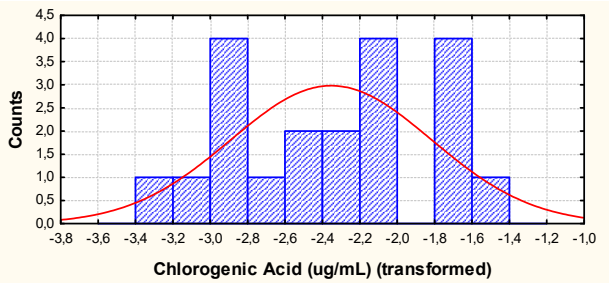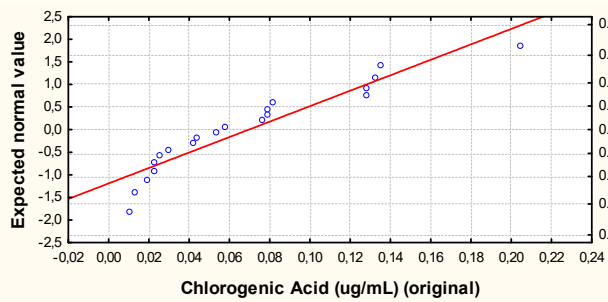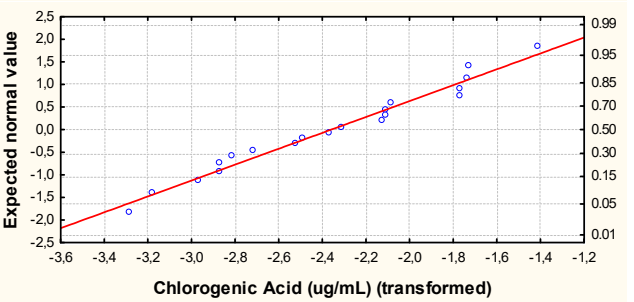

e)

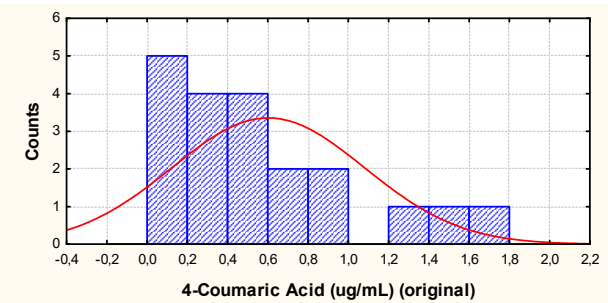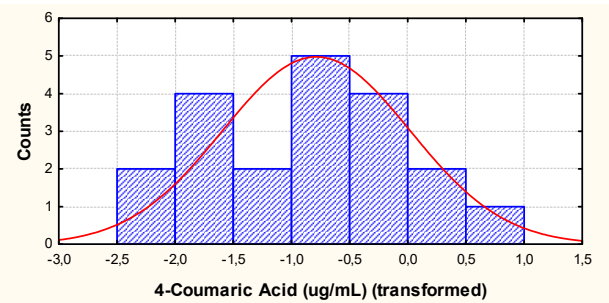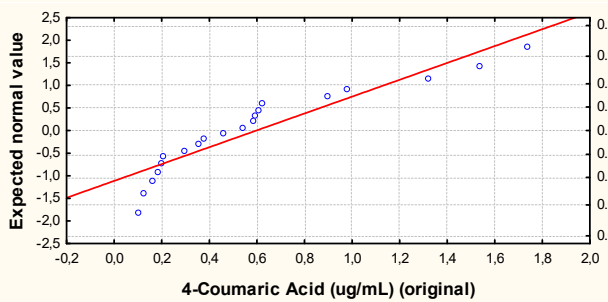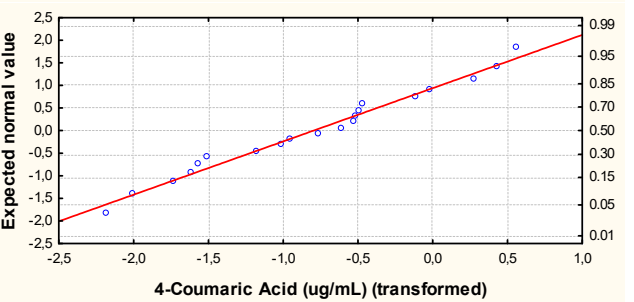

f)

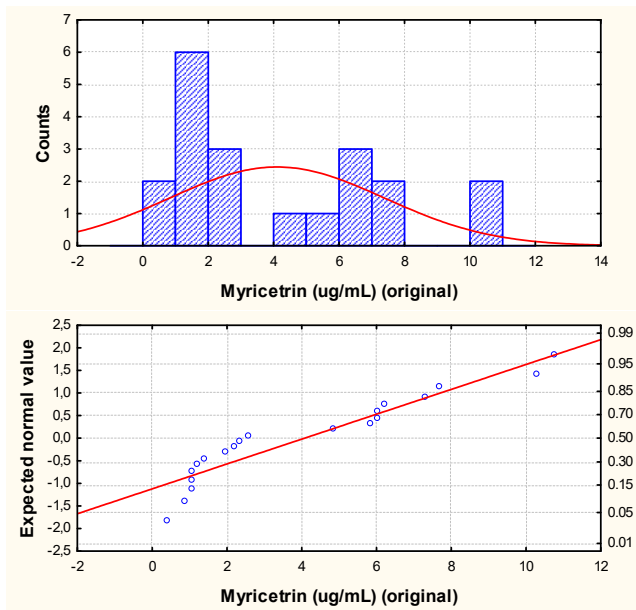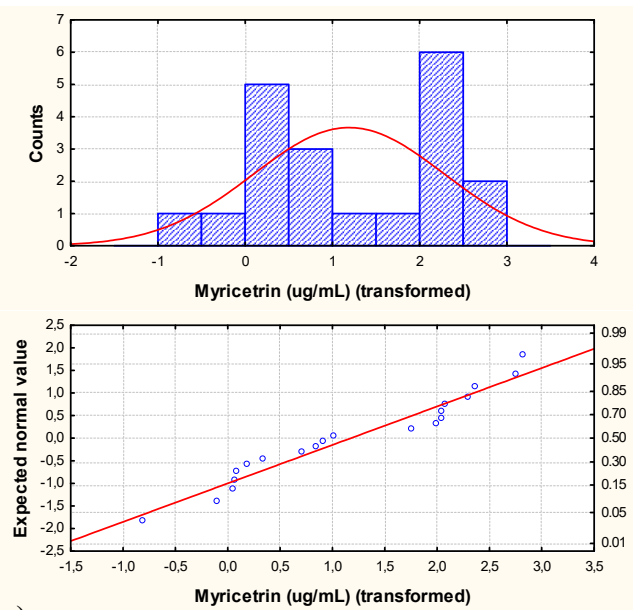

g)

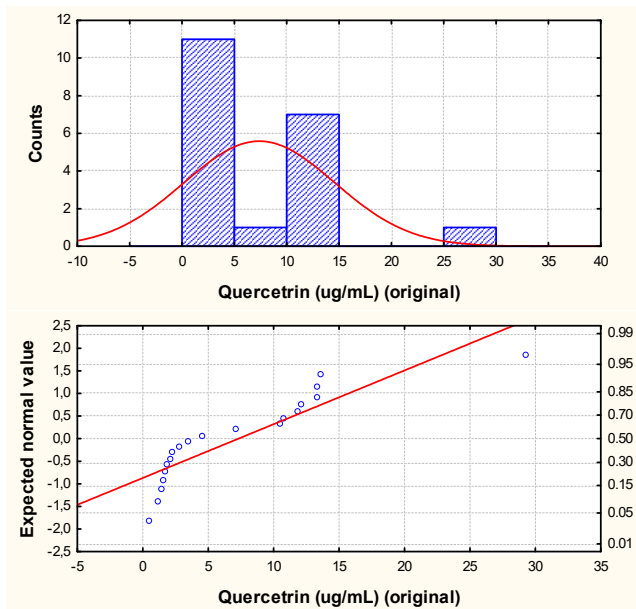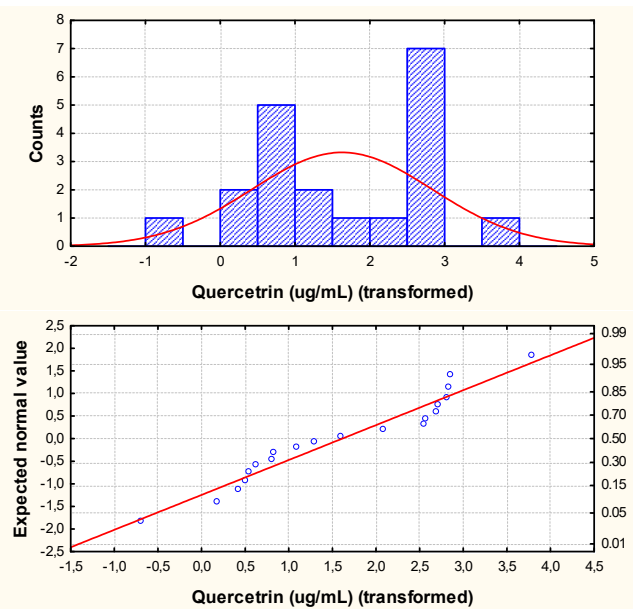

h)

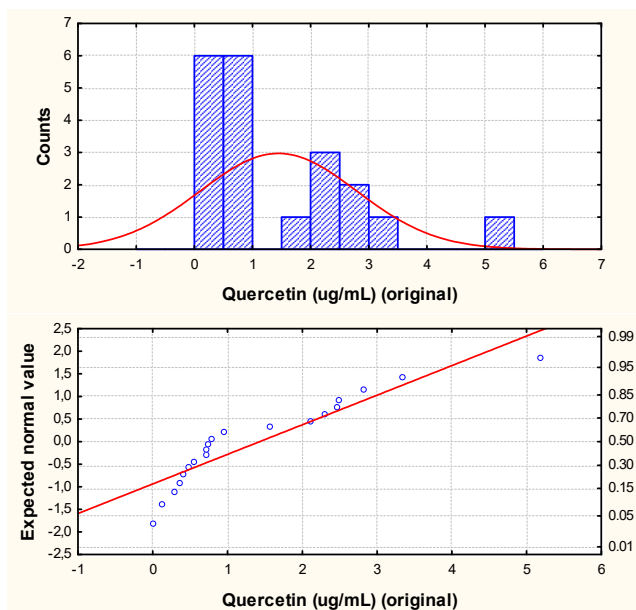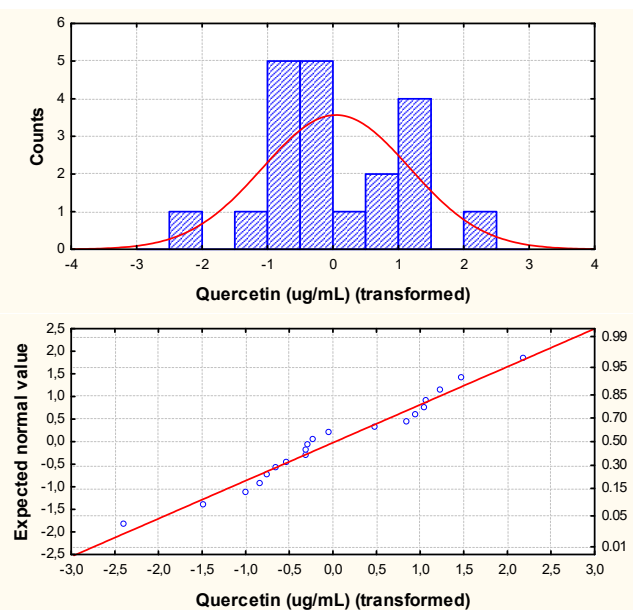

i)

**Figure S1.** Histogram and normality plots of original and Box-Cox transformed data based on the equation  $y(\lambda) = (y^\lambda - 1)/\lambda$ . a) gallic acid ( $\lambda = 0.1552$ ); b) PrB1 ( $\lambda = 0.3009$ ); c) PrB2 ( $\lambda = 0.2362$ ); d) ferulic acid ( $\lambda = 0.0029$ ); e) chlorogenic acid ( $\lambda = 0.1512$ ); e) 4-coumaric acid ( $\lambda = 0.040$ ); g) myricitrin ( $\lambda = 0.1391$ ); h) quercitrin ( $\lambda = 0.0672$ ); i) quercetin ( $\lambda = 0.3261$ ).
